# Supplementary material
Source: MDPI journal article supplement (https://www.mdpi.com/2227-9040/11/8/426)
Supplement: s1 [file s1]

Supplementary material

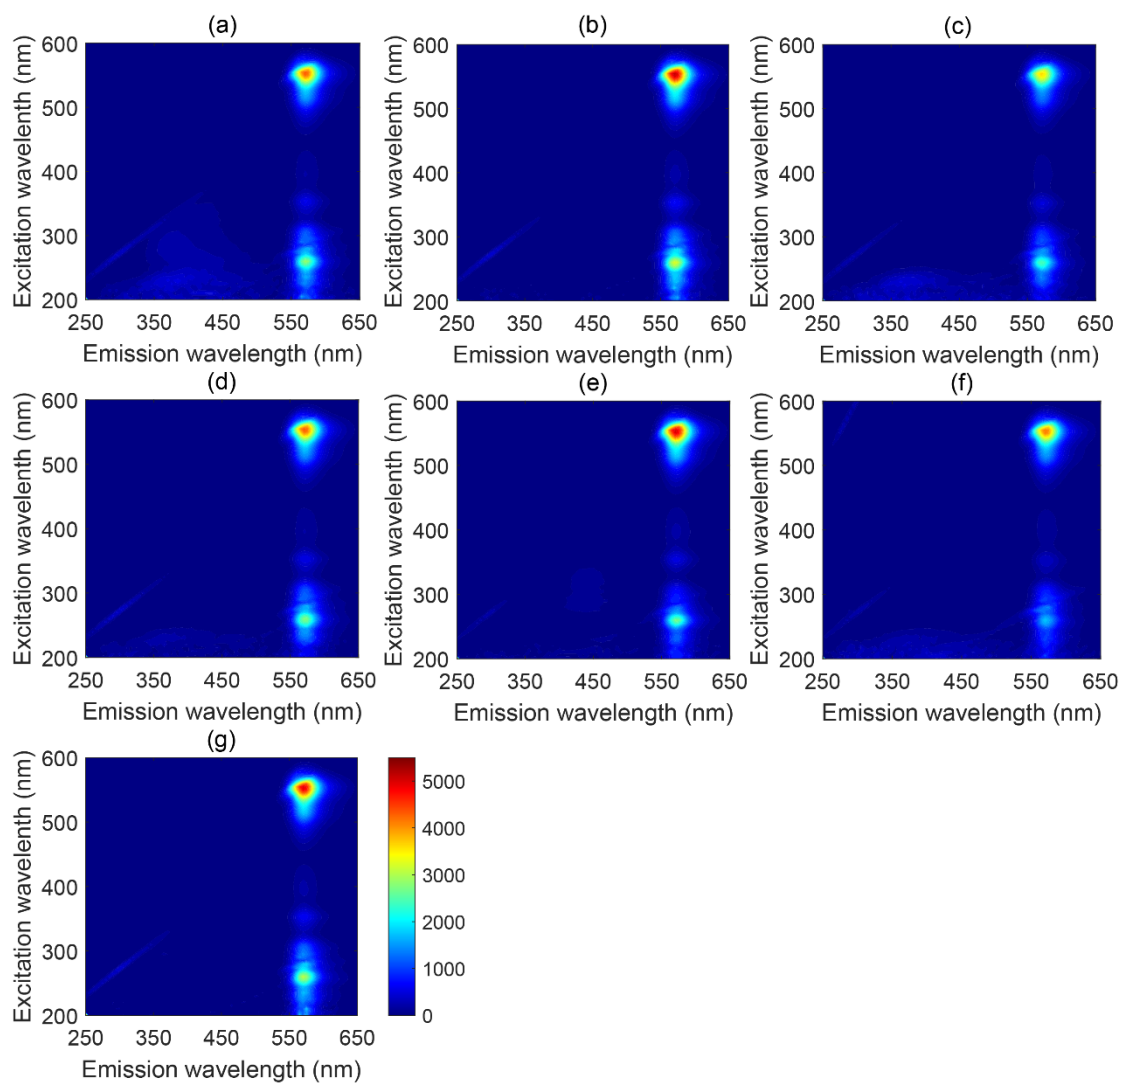

**Figure S1.** EEM fluorescence after removing scattering: (a) RB-L-Lysine; (b) RB-DL-Homocysteine; (c) RB-Cu<sup>2+</sup>; (d) RB-Ca<sup>2+</sup>; (e) RB-Chlorogenic acid; (f) RB-Kaempferol; (g) RB.

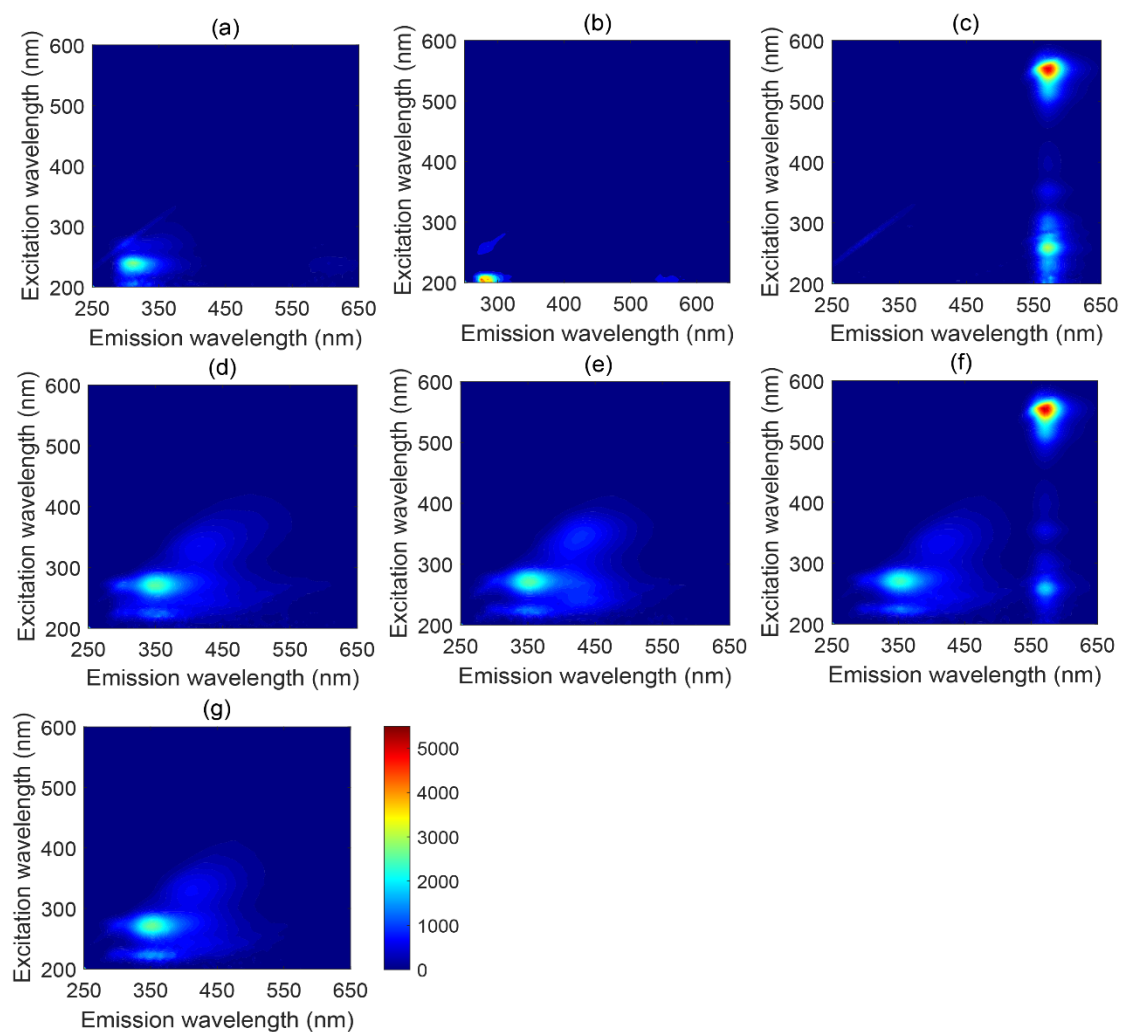

**Figure S2.** EEM fluorescence after removing scattering: (a) DPBA; (b) OPA; (c) RB; (d) DPBA-lily; (e) OPA-lily; (f) RB-lily; (g) pure lily.

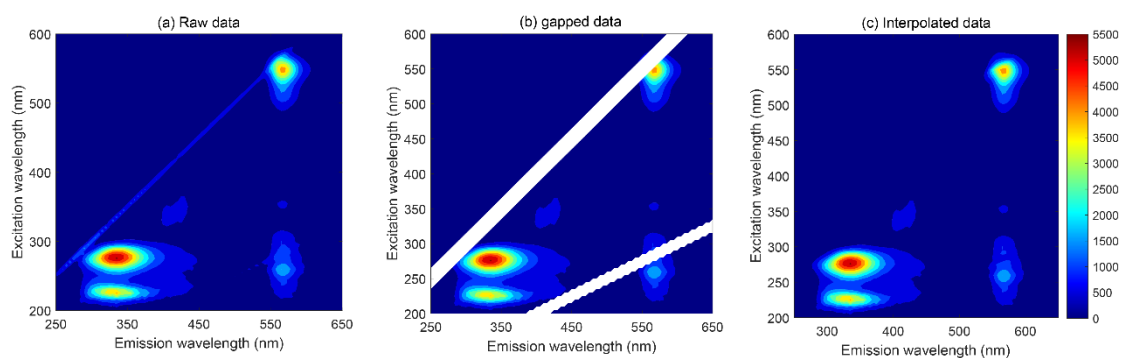

**Figure S3.** The elimination of non-bilinear factor (Rayleigh scattering) for the EEM fluorescence data of fluorophores-lily: (a) raw data with visible Rayleigh scattering; (b) gapped data with scattering being removed in the regions; (c) repaired data fitted by an interpolation method.

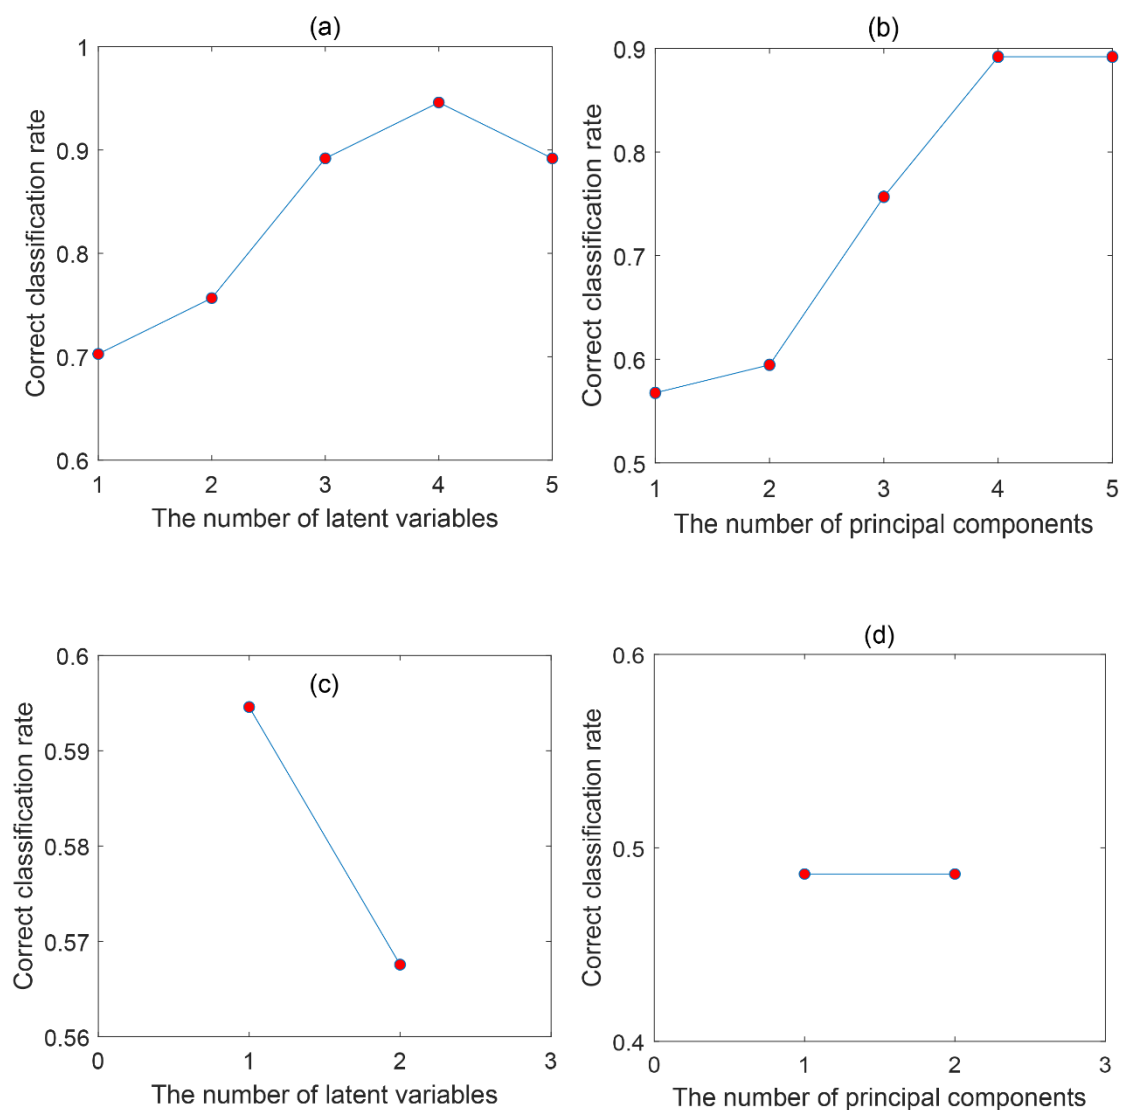

**Figure S4.** The number of latent variables (LVs) for PLS-DA and the number of principal components (PCs) for PCA-LDA were optimized according to the best correct classification rates (CCRs) obtained by 10-fold cross-validation: (a) Fluorophore-lily-PLS-DA; (b) Fluorophore-lily-PCA-LDA; (c) Lily-PLS-DA; (d) Lily-PCA-LDA.

**Table S1.** The intensities of pure RB and RB added with different chemical components at different excitation/emission wavelength.

| chemical component  | Concentration<br>(ug/ml) | 555/565 nm | 260/565 nm |
|---------------------|--------------------------|------------|------------|
| RB                  | 4.6                      | 4415       | 2804       |
| RB-L-Lysine         | 4.6-7.3                  | 3877       | 2607       |
| RB-DL-Homocysteine  | 4.6-6.75                 | 4561       | 2555       |
| RB-Cu <sup>2+</sup> | 4.6-0.1                  | 3272       | 2314       |
| RB-Ca <sup>2+</sup> | 4.6-0.1                  | 3822       | 2500       |
| RB-Chlorogenic acid | 4.6-11.15                | 4477       | 2387       |
| RB-Kaempferol       | 4.6-12.5                 | 3786       | 1592       |
